# Supplementary material
Source: publisher figshare collection journal article supplement (https://geolsoc.figshare.com/articles/dataset/_/3453338)
Supplement: Supplementary file 2 [file 1]

Supplemental Material

$^{40}\text{Ar}/^{39}\text{Ar}$  geochronology and the diffusion of  $^{39}\text{Ar}$  in phengite-muscovite  
intergrowths during step-heating experiments *in vacuo*

Marnie Forster and Gordon Lister

APPENDIX B - *eArgon* data files

<eArgon\_datafile>

<sample\_description>

ALP00-52 MARNIE FORSTER Cime de Bonze omphacite-garnet boudin - CAN 118

</sample\_description>

| Temp<br>(C) | time<br>(min) | Ar36<br>(mol) | Ar37<br>(mol) | Ar39<br>(mol) | Ar40<br>(mol) | % Ar40* | Ar40*/Ar39(K) | Cumulative<br>Ar39 (%) | Calculated age<br>(Ma $\pm$ 1 s.d.) | Ca/K    |
|-------------|---------------|---------------|---------------|---------------|---------------|---------|---------------|------------------------|-------------------------------------|---------|
| 550         | 15            | 8.535E-17     | 2.286E-18     | 7.036E-16     | 3.372E-14     | 25.2    | 12.053        | 0.12                   | 57.70 $\pm$ 7.17                    | 6.17E-3 |
| 600         | 15            | 1.037E-16     | 1.861E-17     | 1.349E-15     | 4.867E-14     | 36.9    | 13.332        | 0.35                   | 63.72 $\pm$ 2.91                    | 2.62E-2 |
| 650         | 15            | 1.169E-16     | 5.014E-17     | 3.005E-15     | 7.425E-14     | 53.4    | 13.181        | 0.86                   | 63.01 $\pm$ 1.23                    | 3.17E-2 |
| 700         | 15            | 1.059E-16     | 9.848E-19     | 6.726E-15     | 1.240E-13     | 74.6    | 13.754        | 1.99                   | 65.70 $\pm$ 0.58                    | 2.78E-4 |
| 750         | 15            | 1.076E-16     | 2.450E-17     | 1.399E-14     | 2.312E-13     | 86.1    | 14.227        | 4.36                   | 67.91 $\pm$ 0.36                    | 3.33E-3 |
| 780         | 15            | 8.849E-17     | 3.805E-17     | 1.631E-14     | 2.614E-13     | 89.8    | 14.393        | 7.12                   | 68.69 $\pm$ 0.27                    | 4.43E-3 |
| 810         | 15            | 1.067E-16     | 8.065E-17     | 2.211E-14     | 3.515E-13     | 90.9    | 14.444        | 10.85                  | 68.93 $\pm$ 0.23                    | 6.93E-3 |
| 840         | 15            | 1.676E-16     | 6.364E-17     | 3.264E-14     | 5.248E-13     | 90.4    | 14.533        | 16.37                  | 69.34 $\pm$ 0.22                    | 3.70E-3 |
| 870         | 15            | 5.582E-16     | 7.978E-17     | 6.517E-14     | 1.129E-12     | 85.2    | 14.759        | 27.39                  | 70.40 $\pm$ 0.22                    | 2.33E-3 |
| 890         | 15            | 1.404E-15     | 1.194E-17     | 1.148E-13     | 2.162E-12     | 80.7    | 15.197        | 46.79                  | 72.45 $\pm$ 0.39                    | 1.98E-4 |
| 910         | 15            | 6.882E-16     | 1.195E-17     | 1.066E-13     | 1.774E-12     | 88.4    | 14.708        | 64.81                  | 70.17 $\pm$ 0.42                    | 2.13E-4 |
| 1030        | 15            | 9.220E-16     | 1.195E-17     | 1.347E-13     | 2.297E-12     | 88.0    | 15.004        | 87.59                  | 71.55 $\pm$ 0.47                    | 1.69E-4 |
| 1070        | 15            | 1.180E-16     | 2.720E-16     | 2.526E-14     | 4.186E-13     | 91.5    | 15.163        | 91.86                  | 72.29 $\pm$ 0.44                    | 2.05E-2 |
| 1120        | 15            | 6.945E-17     | 6.933E-16     | 1.738E-14     | 2.845E-13     | 92.6    | 15.160        | 94.80                  | 72.28 $\pm$ 0.39                    | 7.58E-2 |
| 1200        | 15            | 6.032E-17     | 7.257E-16     | 1.030E-14     | 1.700E-13     | 89.4    | 14.761        | 96.54                  | 70.41 $\pm$ 0.44                    | 1.34E-1 |
| 1450        | 15            | 3.078E-16     | 1.996E-16     | 2.046E-14     | 4.039E-13     | 77.4    | 15.271        | 100.00                 | 72.80 $\pm$ 0.30                    | 1.85E-2 |

</data\_from\_KArDate\_program\_plus\_time>

Total 5.011E-15 2.285E-15 5.915E-13 1.029E-11 14.865 70.90  $\pm$  0.40

Lambda K40 = 5.5430E-10 J = 2.6964E-3

</eArgon\_datafile>

<eArgon\_datafile>

<sample\_description>

ALP00-117B MARNIE FORSTER Entrelor shear zone button schist - CAN 118

</sample\_description>

| Temp<br>(C) | time<br>(min) | Ar36<br>(mol) | Ar37<br>(mol) | Ar39<br>(mol) | Ar40<br>(mol) | % Ar40* | Ar40*/Ar39(K) | Cumulative<br>Ar39 (%) | Calculated age<br>(Ma ± 1 s.d.) | Ca/K |
|-------------|---------------|---------------|---------------|---------------|---------------|---------|---------------|------------------------|---------------------------------|------|
|-------------|---------------|---------------|---------------|---------------|---------------|---------|---------------|------------------------|---------------------------------|------|

<data\_from\_KArDate\_program\_plus\_time>

|      |    |           |           |           |           |      |        |        |                |         |
|------|----|-----------|-----------|-----------|-----------|------|--------|--------|----------------|---------|
| 550  | 15 | 1.846E-16 | 2.414E-18 | 1.063E-16 | 6.203E-14 | 12.0 | 70.278 | 0.16   | 318.54 ± 74.53 | 4.31E-2 |
| 600  | 15 | 1.213E-16 | 2.075E-16 | 2.530E-16 | 4.038E-14 | 11.3 | 17.975 | 0.55   | 86.98 ± 27.26  | 1.56E+0 |
| 650  | 15 | 8.828E-17 | 9.149E-16 | 6.862E-16 | 3.333E-14 | 22.0 | 10.680 | 1.59   | 52.18 ± 2.81   | 2.54E+0 |
| 700  | 15 | 8.623E-17 | 8.162E-16 | 1.686E-15 | 3.719E-14 | 31.6 | 6.973  | 4.16   | 34.24 ± 1.39   | 9.20E-1 |
| 750  | 15 | 1.134E-16 | 3.841E-16 | 3.515E-15 | 5.942E-14 | 43.5 | 7.359  | 9.52   | 36.12 ± 0.85   | 2.08E-1 |
| 780  | 15 | 1.085E-16 | 2.371E-16 | 3.975E-15 | 6.291E-14 | 48.9 | 7.738  | 15.58  | 37.96 ± 0.94   | 1.13E-1 |
| 810  | 15 | 1.351E-16 | 3.084E-16 | 4.953E-15 | 7.782E-14 | 48.6 | 7.628  | 23.14  | 37.42 ± 0.72   | 1.18E-1 |
| 840  | 15 | 2.145E-16 | 3.584E-16 | 6.205E-15 | 1.104E-13 | 42.5 | 7.553  | 32.60  | 37.06 ± 0.74   | 1.10E-1 |
| 870  | 15 | 2.338E-16 | 4.799E-16 | 8.745E-15 | 1.383E-13 | 49.9 | 7.895  | 45.93  | 38.72 ± 0.68   | 1.04E-1 |
| 900  | 15 | 1.034E-16 | 2.570E-16 | 5.221E-15 | 7.038E-14 | 56.4 | 7.610  | 53.89  | 37.33 ± 0.72   | 9.35E-2 |
| 930  | 15 | 7.740E-17 | 1.188E-16 | 4.149E-15 | 5.579E-14 | 58.8 | 7.911  | 60.22  | 38.80 ± 0.78   | 5.44E-2 |
| 970  | 15 | 9.091E-17 | 2.398E-16 | 4.609E-15 | 6.281E-14 | 57.1 | 7.778  | 67.24  | 38.15 ± 0.87   | 9.89E-2 |
| 1020 | 15 | 1.070E-16 | 2.757E-16 | 5.889E-15 | 7.733E-14 | 59.0 | 7.743  | 76.22  | 37.98 ± 0.58   | 8.90E-2 |
| 1070 | 15 | 1.402E-16 | 4.726E-16 | 7.304E-15 | 9.894E-14 | 58.0 | 7.852  | 87.36  | 38.51 ± 0.45   | 1.23E-1 |
| 1130 | 15 | 8.865E-17 | 4.308E-16 | 5.467E-15 | 7.075E-14 | 62.8 | 8.132  | 95.70  | 39.87 ± 0.51   | 1.50E-1 |
| 1250 | 15 | 6.207E-17 | 1.820E-16 | 2.409E-15 | 3.976E-14 | 53.8 | 8.871  | 99.37  | 43.45 ± 1.32   | 1.44E-1 |
| 1450 | 15 | 3.086E-16 | 4.093E-17 | 4.135E-16 | 9.645E-14 | 5.4  | 12.684 | 100.00 | 61.81 ± 26.87  | 1.88E-1 |

</data\_from\_KArDate\_program\_plus\_time>

|       |           |           |           |           |  |       |  |              |  |  |
|-------|-----------|-----------|-----------|-----------|--|-------|--|--------------|--|--|
| Total | 2.264E-15 | 5.727E-15 | 6.559E-14 | 1.194E-12 |  | 7.987 |  | 39.17 ± 1.14 |  |  |
|-------|-----------|-----------|-----------|-----------|--|-------|--|--------------|--|--|

Lambda K40 = 5.5430E-10 J = 2.7478E-3

</eArgon\_datafile>

<eArgon\_datafile>

<sample\_description>

ALP01-159B w.m. MARNIE FORSTER LagoDiCignana CAN 118 greenschist overprint in young shear zone with crenulation

</sample\_description>

| Temp<br>(C) | time<br>(min) | Ar36<br>(mol) | Ar37<br>(mol) | Ar38<br>(mol) | Ar39<br>(mol) | Ar40<br>(mol) | %Ar40* | Ar40*/Ar39(K) | Cumulative<br>Ar39(%) | Calculated_Age<br>(Ma±1s.d.) | Ca/K    | Cl/K    |
|-------------|---------------|---------------|---------------|---------------|---------------|---------------|--------|---------------|-----------------------|------------------------------|---------|---------|
| 550         | 15            | 9.294E-17     | 1.969E-20     | 6.163E-17     | 2.148E-16     | 2.978E-14     | 7.7    | 10.741        | 0.02                  | 51.86 ± 7.23                 | 1.74E-4 | 1.22E-2 |
| 650         | 15            | 1.053E-16     | 1.438E-17     | 1.033E-16     | 5.025E-16     | 3.481E-14     | 10.6   | 7.343         | 0.08                  | 35.62 ± 3.30                 | 5.44E-2 | 6.60E-3 |
| 750         | 15            | 1.219E-16     | 2.233E-18     | 2.560E-16     | 1.452E-15     | 4.913E-14     | 26.6   | 8.996         | 0.23                  | 43.54 ± 1.19                 | 2.92E-3 | 5.79E-3 |
| 800         | 15            | 1.012E-16     | 1.631E-17     | 4.192E-16     | 2.693E-15     | 5.186E-14     | 42.2   | 8.123         | 0.52                  | 39.36 ± 0.53                 | 1.15E-2 | 4.08E-3 |
| 850         | 15            | 1.332E-16     | 1.974E-20     | 1.058E-15     | 6.651E-15     | 9.319E-14     | 57.5   | 8.062         | 1.23                  | 39.07 ± 0.34                 | 5.64E-6 | 5.05E-3 |
| 900         | 15            | 1.331E-16     | 1.411E-17     | 2.167E-15     | 1.358E-14     | 1.491E-13     | 73.3   | 8.052         | 2.69                  | 39.02 ± 0.15                 | 1.97E-3 | 5.39E-3 |
| 940         | 15            | 2.114E-16     | 1.768E-17     | 3.716E-15     | 2.343E-14     | 2.496E-13     | 74.7   | 7.957         | 5.20                  | 38.56 ± 0.13                 | 1.43E-3 | 5.27E-3 |
| 970         | 15            | 3.977E-16     | 1.622E-17     | 4.822E-15     | 3.031E-14     | 3.608E-13     | 67.2   | 7.995         | 8.45                  | 38.75 ± 0.17                 | 1.02E-3 | 5.23E-3 |
| 990         | 15            | 6.103E-16     | 2.605E-17     | 7.093E-15     | 4.474E-14     | 5.313E-13     | 65.8   | 7.816         | 13.24                 | 37.89 ± 0.21                 | 1.11E-3 | 5.14E-3 |
| 1010        | 15            | 1.163E-15     | 5.534E-17     | 1.892E-14     | 1.196E-13     | 1.289E-12     | 73.1   | 7.875         | 26.06                 | 38.17 ± 0.17                 | 8.79E-4 | 5.19E-3 |
| 1030        | 15            | 6.901E-16     | 3.359E-17     | 2.055E-14     | 1.313E-13     | 1.256E-12     | 83.4   | 7.982         | 40.13                 | 38.68 ± 0.11                 | 4.86E-4 | 5.08E-3 |
| 1050        | 15            | 6.670E-16     | 6.387E-17     | 2.188E-14     | 1.401E-13     | 1.317E-12     | 84.7   | 7.966         | 55.15                 | 38.61 ± 0.10                 | 8.66E-4 | 5.04E-3 |
| 1070        | 15            | 7.218E-16     | 9.586E-17     | 1.884E-14     | 1.203E-13     | 1.175E-12     | 81.5   | 7.963         | 68.04                 | 38.59 ± 0.10                 | 1.51E-3 | 5.07E-3 |
| 1090        | 15            | 7.276E-16     | 3.323E-17     | 1.585E-14     | 1.004E-13     | 1.020E-12     | 78.6   | 7.989         | 78.80                 | 38.72 ± 0.13                 | 6.29E-4 | 5.23E-3 |
| 1110        | 15            | 6.184E-16     | 4.464E-17     | 1.350E-14     | 8.575E-14     | 8.706E-13     | 78.7   | 7.991         | 87.99                 | 38.73 ± 0.12                 | 9.89E-4 | 5.15E-3 |
| 1130        | 15            | 2.559E-16     | 3.337E-17     | 7.147E-15     | 4.528E-14     | 4.408E-13     | 82.5   | 8.034         | 92.84                 | 38.93 ± 0.11                 | 1.40E-3 | 5.25E-3 |
| 1160        | 15            | 1.785E-16     | 3.369E-20     | 6.371E-15     | 4.049E-14     | 3.809E-13     | 85.8   | 8.074         | 97.18                 | 39.12 ± 0.08                 | 1.58E-6 | 5.22E-3 |
| 1190        | 15            | 1.219E-16     | 2.282E-17     | 2.535E-15     | 1.626E-14     | 1.681E-13     | 78.3   | 8.098         | 98.92                 | 39.24 ± 0.19                 | 2.67E-3 | 4.94E-3 |
| 1230        | 15            | 7.909E-17     | 2.490E-17     | 8.154E-16     | 5.214E-15     | 6.490E-14     | 63.8   | 7.935         | 99.48                 | 38.46 ± 0.44                 | 9.08E-3 | 4.79E-3 |
| 1270        | 15            | 1.057E-16     | 2.361E-17     | 4.420E-16     | 2.700E-15     | 5.300E-14     | 40.9   | 8.032         | 99.77                 | 38.92 ± 0.81                 | 1.66E-2 | 5.19E-3 |
| 1330        | 15            | 1.785E-16     | 5.624E-18     | 2.670E-16     | 1.503E-15     | 6.591E-14     | 19.9   | 8.735         | 99.93                 | 42.29 ± 1.78                 | 7.11E-3 | 5.05E-3 |
| 1450        | 15            | 7.612E-17     | 3.375E-20     | 1.188E-16     | 6.302E-16     | 2.702E-14     | 16.7   | 7.148         | 100.00                | 34.68 ± 4.51                 | 1.02E-4 | 6.53E-3 |

</data\_from\_Noble\_program\_plus\_time>

Total 7.490E-15 5.440E-16 1.469E-13 9.331E-13 9.677E-12 7.970 38.62 ± 0.15

Lambda K40=5.5430E-10 J=2.7153E-3

</eArgon\_datafile>

<eArgon\_datafile>

<sample\_description>

Marnie Forster ALP00-32 CAN 118, Ivrea gneiss minuti/EMS/2DK, VG1200

</sample\_description>

| Temp<br>(C)                            | time<br>(min) | Ar36<br>(mol) | Ar37<br>(mol) | Ar39<br>(mol) | Ar40<br>(mol) | % Ar40* | Ar40*/Ar39(K) | Cumulative<br>Ar39 (%) | Calculated age<br>(Ma ± 1 s.d.) | Ca/K    |
|----------------------------------------|---------------|---------------|---------------|---------------|---------------|---------|---------------|------------------------|---------------------------------|---------|
| <data_from_KArDate_program_plus_time>  |               |               |               |               |               |         |               |                        |                                 |         |
| 550                                    | 15            | 1.025E-16     | 2.071E-18     | 1.268E-15     | 4.314E-14     | 29.7    | 10.101        | 0.16                   | 48.75 ± 3.11                    | 3.10E-3 |
| 650                                    | 15            | 9.288E-17     | 7.216E-17     | 5.617E-15     | 8.691E-14     | 68.3    | 10.561        | 0.88                   | 50.94 ± 0.76                    | 2.44E-2 |
| 750                                    | 15            | 1.121E-16     | 1.319E-16     | 1.959E-14     | 2.468E-13     | 86.4    | 10.881        | 3.40                   | 52.46 ± 0.22                    | 1.28E-2 |
| 800                                    | 15            | 9.344E-17     | 4.260E-17     | 2.393E-14     | 2.908E-13     | 90.3    | 10.973        | 6.46                   | 52.90 ± 0.18                    | 3.38E-3 |
| 850                                    | 15            | 2.325E-16     | 1.202E-16     | 4.463E-14     | 5.696E-13     | 87.7    | 11.198        | 12.19                  | 53.97 ± 0.26                    | 5.12E-3 |
| 870                                    | 15            | 1.427E-16     | 2.107E-18     | 5.067E-14     | 6.190E-13     | 93.0    | 11.359        | 18.69                  | 54.73 ± 0.15                    | 7.90E-5 |
| 890                                    | 15            | 1.259E-16     | 1.235E-16     | 6.426E-14     | 7.727E-13     | 95.0    | 11.419        | 26.93                  | 55.02 ± 0.16                    | 3.65E-3 |
| 910                                    | 15            | 1.252E-16     | 2.175E-16     | 7.823E-14     | 9.333E-13     | 95.8    | 11.430        | 36.96                  | 55.07 ± 0.29                    | 5.28E-3 |
| 930                                    | 15            | 1.326E-16     | 2.269E-16     | 8.470E-14     | 9.983E-13     | 95.8    | 11.296        | 47.83                  | 54.43 ± 0.14                    | 5.09E-3 |
| 950                                    | 15            | 1.415E-16     | 5.237E-16     | 8.515E-14     | 1.013E-12     | 95.6    | 11.378        | 58.75                  | 54.82 ± 0.15                    | 1.17E-2 |
| 970                                    | 15            | 1.192E-16     | 6.023E-16     | 7.597E-14     | 9.152E-13     | 95.9    | 11.557        | 68.49                  | 55.67 ± 0.16                    | 1.51E-2 |
| 990                                    | 15            | 1.104E-16     | 3.287E-16     | 6.690E-14     | 8.101E-13     | 95.8    | 11.596        | 77.07                  | 55.85 ± 0.15                    | 9.34E-3 |
| 1010                                   | 15            | 8.309E-17     | 1.967E-16     | 5.826E-14     | 7.095E-13     | 96.3    | 11.730        | 84.55                  | 56.49 ± 0.18                    | 6.42E-3 |
| 1040                                   | 15            | 7.704E-17     | 2.729E-16     | 5.102E-14     | 6.225E-13     | 96.1    | 11.727        | 91.09                  | 56.48 ± 0.19                    | 1.02E-2 |
| 1080                                   | 15            | 4.555E-17     | 8.240E-16     | 3.061E-14     | 3.797E-13     | 96.3    | 11.942        | 95.02                  | 57.49 ± 0.21                    | 5.11E-2 |
| 1130                                   | 15            | 4.461E-17     | 1.062E-15     | 1.462E-14     | 1.929E-13     | 93.0    | 12.277        | 96.89                  | 59.08 ± 0.23                    | 1.38E-1 |
| 1200                                   | 15            | 5.786E-17     | 9.256E-16     | 9.200E-15     | 1.330E-13     | 87.0    | 12.579        | 98.07                  | 60.51 ± 0.27                    | 1.91E-1 |
| 1350                                   | 15            | 1.875E-16     | 5.121E-16     | 1.501E-14     | 2.431E-13     | 77.1    | 12.474        | 100.00                 | 60.01 ± 0.39                    | 6.48E-2 |
| 1450                                   | 15            | 4.181E-16     | 2.194E-18     | 3.165E-17     | 1.274E-13     | 3.0     | 121.634       | 100.00                 | 514.24 ± 1744.75                | 1.32E-1 |
| </data_from_KArDate_program_plus_time> |               |               |               |               |               |         |               |                        |                                 |         |
| Total                                  |               | 2.445E-15     | 6.189E-15     | 7.797E-13     | 9.707E-12     |         | 11.497        |                        | 55.39 ± 0.27                    |         |
| Lambda K40 = 5.5430E-10 J = 2.7116E-3  |               |               |               |               |               |         |               |                        |                                 |         |
| </eArgon_datafile>                     |               |               |               |               |               |         |               |                        |                                 |         |

<eArgon\_datafile>

<sample\_description>

AG 03-13 Faros, within SZ rim

</sample\_description>

| Temp<br>(C) | Ar36<br>(mol) | Ar37<br>(mol) | Ar39<br>(mol) | Ar40<br>(mol) | % Ar40* | Ar40*/Ar39(K) | Cumulative<br>Ar39 (%) | Calculated age<br>( Ma ± 1 s.d.) | Ca/K    |
|-------------|---------------|---------------|---------------|---------------|---------|---------------|------------------------|----------------------------------|---------|
| 500         | 2.566E-17     | 2.493E-17     | 1.697E-16     | 9.117E-15     | 16.8    | 9.038         | 0.10                   | 19.22 ± 8.71                     | 2.79E-1 |
| 550         | 2.119E-17     | 3.808E-17     | 2.942E-16     | 9.286E-15     | 32.5    | 10.262        | 0.28                   | 21.81 ± 3.82                     | 2.46E-1 |
| 600         | 2.036E-17     | 1.333E-16     | 6.739E-16     | 1.342E-14     | 55.1    | 10.985        | 0.68                   | 23.33 ± 1.47                     | 3.76E-1 |
| 650         | 1.949E-17     | 1.697E-16     | 1.481E-15     | 2.445E-14     | 76.4    | 12.605        | 1.58                   | 26.75 ± 0.51                     | 2.18E-1 |
| 700         | 3.008E-17     | 6.379E-17     | 2.884E-15     | 4.567E-14     | 80.4    | 12.728        | 3.31                   | 27.01 ± 0.33                     | 4.20E-2 |
| 750         | 3.565E-17     | 7.255E-17     | 5.209E-15     | 7.700E-14     | 86.1    | 12.734        | 6.45                   | 27.02 ± 0.26                     | 2.65E-2 |
| 790         | 4.747E-17     | 9.492E-18     | 8.069E-15     | 1.227E-13     | 88.4    | 13.436        | 11.30                  | 28.50 ± 0.24                     | 2.24E-3 |
| 820         | 8.292E-17     | 3.280E-17     | 1.811E-14     | 2.864E-13     | 91.3    | 14.432        | 22.21                  | 30.59 ± 0.15                     | 3.44E-3 |
| 840         | 7.356E-17     | 1.536E-18     | 2.660E-14     | 4.200E-13     | 94.7    | 14.945        | 38.22                  | 31.67 ± 0.11                     | 1.10E-4 |
| 860         | 5.085E-17     | 1.089E-17     | 1.703E-14     | 2.809E-13     | 94.5    | 15.581        | 48.47                  | 33.01 ± 0.12                     | 1.21E-3 |
| 880         | 5.017E-17     | 1.538E-18     | 1.344E-14     | 2.322E-13     | 93.5    | 16.146        | 56.56                  | 34.19 ± 0.13                     | 2.17E-4 |
| 900         | 4.803E-17     | 1.539E-18     | 1.534E-14     | 2.593E-13     | 94.4    | 15.949        | 65.79                  | 33.78 ± 0.18                     | 1.91E-4 |
| 920         | 4.734E-17     | 1.540E-18     | 1.919E-14     | 3.029E-13     | 95.2    | 15.024        | 77.35                  | 31.84 ± 0.16                     | 1.52E-4 |
| 940         | 3.663E-17     | 1.541E-18     | 1.719E-14     | 2.451E-13     | 95.4    | 13.599        | 87.70                  | 28.84 ± 0.15                     | 1.70E-4 |
| 970         | 2.237E-17     | 1.792E-17     | 9.844E-15     | 1.233E-13     | 94.4    | 11.822        | 93.62                  | 25.10 ± 0.12                     | 3.46E-3 |
| 1000        | 1.959E-17     | 2.469E-17     | 5.081E-15     | 5.993E-14     | 90.1    | 10.629        | 96.68                  | 22.58 ± 0.14                     | 9.23E-3 |
| 1050        | 2.149E-17     | 4.128E-17     | 3.656E-15     | 4.582E-14     | 85.9    | 10.770        | 98.88                  | 22.88 ± 0.18                     | 2.15E-2 |
| 1100        | 2.111E-17     | 1.608E-18     | 9.759E-16     | 1.854E-14     | 66.2    | 12.583        | 99.47                  | 26.70 ± 0.99                     | 3.13E-3 |
| 1200        | 2.819E-17     | 6.326E-17     | 7.774E-16     | 1.897E-14     | 56.0    | 13.674        | 99.94                  | 29.00 ± 0.91                     | 1.55E-1 |
| 1350        | 5.428E-17     | 5.452E-17     | 9.524E-17     | 1.728E-14     | 7.2     | 13.061        | 99.99                  | 27.71 ± 44.21                    | 1.09E+0 |
| 1450        | 1.138E-16     | 1.107E-17     | 1.007E-17     | 3.351E-14     | -0.4    | 0.001         | 100.00                 | 0.002 ± 3128.238                 | 2.09E+0 |

</data\_from\_KArDate\_program>

Total 8.703E-16 7.776E-16 1.661E-13 2.646E-12 14.351 30.42 ± 0.40

Lambda K40 = 5.5430E-10 J = 1.1850E-3

<data\_for\_duration\_of\_heating\_steps>

15.0

15.0

15.0

15.0

15.0

15.0

15.0

15.0

15.0

15.0

15.0

15.0

15.0

15.0

15.0

15.0

15.0

15.0

15.0

15.0

15.0

</data\_for\_duration\_of\_heating\_steps>

</eArgon\_datafile>

<eArgon\_datafile>

<sample\_description>

Age spectrum data

AG03-19 In river bed below the GSD and marble contact

Schist with small garnet

M4

</sample\_description>

| Temp<br>(C) | Ar36<br>(mol) | Ar37<br>(mol) | Ar39<br>(mol) | Ar40<br>(mol) | % Ar40* | Ar40*/Ar39(K) | Cumulative<br>Ar39 (%) | Calculated age<br>(Ma ± 1 s.d.) | Ca/K    |
|-------------|---------------|---------------|---------------|---------------|---------|---------------|------------------------|---------------------------------|---------|
| 500         | 1.645E-16     | 1.185E-18     | 1.703E-16     | 5.449E-14     | 10.8    | 34.459        | 0.08                   | 72.00 ± 19.80                   | 1.32E-2 |
| 550         | 8.553E-17     | 1.920E-17     | 2.317E-16     | 2.897E-14     | 12.7    | 15.923        | 0.18                   | 33.63 ± 11.35                   | 1.57E-1 |
| 600         | 6.673E-17     | 3.873E-17     | 5.226E-16     | 2.570E-14     | 23.2    | 11.423        | 0.43                   | 24.19 ± 3.98                    | 1.41E-1 |
| 650         | 4.523E-17     | 1.505E-17     | 1.148E-15     | 2.974E-14     | 55.0    | 14.244        | 0.95                   | 30.11 ± 0.54                    | 2.49E-2 |
| 700         | 4.941E-17     | 1.824E-17     | 2.508E-15     | 4.862E-14     | 69.8    | 13.535        | 2.11                   | 28.62 ± 0.52                    | 1.38E-2 |
| 750         | 6.053E-17     | 1.665E-17     | 4.934E-15     | 8.640E-14     | 79.1    | 13.860        | 4.37                   | 29.31 ± 0.39                    | 6.41E-3 |
| 790         | 7.908E-17     | 1.735E-17     | 8.638E-15     | 1.509E-13     | 84.4    | 14.737        | 8.35                   | 31.15 ± 0.17                    | 3.82E-3 |
| 820         | 1.144E-16     | 1.339E-18     | 2.469E-14     | 4.293E-13     | 92.0    | 15.990        | 19.70                  | 33.77 ± 0.10                    | 1.03E-4 |
| 840         | 9.945E-17     | 1.340E-18     | 3.982E-14     | 6.797E-13     | 95.5    | 16.303        | 38.01                  | 34.42 ± 0.13                    | 6.39E-5 |
| 860         | 6.522E-17     | 2.786E-17     | 3.005E-14     | 5.093E-13     | 96.1    | 16.281        | 51.82                  | 34.38 ± 0.14                    | 1.76E-3 |
| 880         | 5.660E-17     | 1.457E-18     | 2.184E-14     | 3.713E-13     | 95.3    | 16.213        | 61.86                  | 34.23 ± 0.12                    | 1.27E-4 |
| 900         | 5.629E-17     | 1.457E-18     | 2.422E-14     | 4.113E-13     | 95.8    | 16.269        | 73.00                  | 34.35 ± 0.10                    | 1.14E-4 |
| 920         | 4.500E-17     | 1.536E-18     | 2.181E-14     | 3.525E-13     | 96.1    | 15.523        | 83.03                  | 32.79 ± 0.12                    | 1.34E-4 |
| 940         | 3.317E-17     | 1.537E-18     | 1.623E-14     | 2.374E-13     | 95.7    | 13.999        | 90.49                  | 29.60 ± 0.15                    | 1.80E-4 |
| 970         | 3.063E-17     | 1.445E-18     | 1.076E-14     | 1.423E-13     | 93.4    | 12.357        | 95.44                  | 26.15 ± 0.20                    | 2.55E-4 |
| 1000        | 1.962E-17     | 6.802E-18     | 3.941E-15     | 5.829E-14     | 89.9    | 13.292        | 97.25                  | 28.11 ± 0.14                    | 3.28E-3 |
| 1050        | 2.125E-17     | 1.286E-18     | 1.494E-15     | 3.026E-14     | 79.1    | 16.024        | 97.93                  | 33.84 ± 0.32                    | 1.64E-3 |
| 1100        | 5.836E-17     | 3.151E-17     | 1.158E-15     | 3.838E-14     | 55.0    | 18.224        | 98.47                  | 38.44 ± 1.41                    | 5.17E-2 |
| 1200        | 2.842E-17     | 1.449E-18     | 2.006E-15     | 4.273E-14     | 80.2    | 17.091        | 99.39                  | 36.07 ± 0.47                    | 1.37E-3 |
| 1350        | 5.926E-17     | 2.223E-17     | 1.313E-15     | 4.137E-14     | 57.6    | 18.144        | 99.99                  | 38.27 ± 0.89                    | 3.22E-2 |
| 1450        | 1.102E-16     | 1.451E-18     | 1.616E-17     | 3.660E-14     | 11.0    | 249.018       | 100.00                 | 465.32 ± 755.22                 | 1.71E-1 |

</data\_from\_KArDate\_program>

Total 1.349E-15 2.291E-16 2.175E-13 3.806E-12 15.637 33.03 ± 0.25

Lambda K40 = 5.5430E-10 J = 1.1816E-3

<data\_for\_duration\_of\_heating\_steps>

15.0

15.0

15.0

15.0

15.0

15.0

15.0

15.0

15.0

15.0

15.0

15.0

15.0

15.0

15.0

15.0

15.0

15.0

15.0

15.0

15.0

</data\_for\_duration\_of\_heating\_steps>

</eArgon\_datafile>
