# Supplementary material
Source: publisher figshare collection journal article supplement (https://geolsoc.figshare.com/articles/dataset/_/3453338)
Supplement: Supplementary file 3 [file 1]

## Supplemental Material

# $^{40}\text{Ar}/^{39}\text{Ar}$ geochronology and the diffusion of $^{39}\text{Ar}$ in phengite-muscovite intergrowths during step-heating experiments *in vacuo*

Marnie Forster and Gordon Lister

### Appendix C - C++ code for Arrhenius data

The following routines are C++ code from a class used to perform diffusivity calculations. The mathematics involved is self explanatory, derived from Crank (1975), Watson et al. (1933), cf McDougall and Harrison 1933.

```
double DiffusivityCalculation::FractionalLossCalculationForSlab ( double dt_a2 ) {
    double difference;
    double answer1, answer2;
    int n = 0;
    double z = 0.00, zz, z0, z1, z2, z3;
    zz = dt_a2 * 0.25;
    // if you like you can use an iterative summation
    while ( n <= iteration_count_for_summation ) {
        z0 = (2.0 * n + 1.0);
        z0 = z0 * z0;
        z1 = -z0 * pi_squared * zz;
        if (z1 < -1.0e9)
            z2 = 0.00;
        else
            z2 = exp (z1);
        z3 = (1.0 / z0);
        z = z + z2 * z3;
        n = n + 1.0;
    }
    answer1 = 1.0 - ( 8.0 / pi_squared ) * z;
    // or you can use an approximation
    double s1, s2;
    if ( zz < 1.0e-6)
        s1 = 1.00;
    else
        s1 = 1.00 - ( ( 8.0 / pi_squared ) * exp ( - pi_squared * zz ) );
    s2 = ( 2.00 / sqrt ( local_pi ) ) * sqrt ( dt_a2 );
    if ( s2 < 0.5 )
        answer2 = s2;
    else
        answer2 = s1;
    return answer1;
}
```

```

double DiffusivityCalculation::FractionalLossCalculationForSphere ( double dt_a2 ) {
    double answer;
    double x;
    double z;
    double z1, z2, z3;
    z = 0.00;
    x = 1.0;
    z2 = 0.00;
    while ( x <= iteration_count_for_summation ) {
        z1 = - ( x * x ) * pi_squared * dt_a2;
        if ( z1 < -1.0e4 )
            z2 = 0.00;
        else
            z2 = exp ( z1 );
        z3 = ( 1.0 / ( x * x ) );
        z = z + z2 * z3;
        x = x + 1.0;
    }
    answer = 1.0 - ( 6.0 / pi_squared ) * z;
    return answer;
}

```

```

#define watson_alpha_1    2.404825557695773
#define watson_fractional_release_transition_value    0.78
#define precision_in_watson_formula    0.001

```

```

double DiffusivityCalculation::FractionalReleaseForCylinder( double dt_a2 ) {
    double fractional_release;
    double alpha_squared = watson_alpha_1 * watson_alpha_1;
    double value1, value2;
    double pi_value = atan( 1.00 ) * 4.0;
    // this is the answer if f < 0.78
    double z1 = ( 4.0 * sqrt ( dt_a2 / pi_value ) );
    double z2 = ( pow( dt_a2, 1.5 ) / ( 3.00 * sqrt ( pi_value ) ) );
    value1 = z1 - dt_a2 - z2 - 0.2244122 * ( dt_a2 * dt_a2 );
    // this is the answer if f > 0.78
    value2 = 1.00 - ( ( 4.00 / ( alpha_squared ) ) * exp( -alpha_squared * dt_a2 ) );
    if ( value2 > watson_fractional_release_transition_value )
        fractional_release = value2;
    else
        fractional_release = value1;
    return fractional_release;
}

```
